# Supplementary material for: Soil Nutrient Depletion Is Associated with the Presence of Burkholderia pseudomallei
Source: PubMed Central journal article supplement (PMC5118919; doi:10.1128/aem.02538-16), 2016-11-21
Supplement: AEM.02538-16_zam999117556so1.pdf [file AEM.02538-16_zam999117556so1.pdf]

1 **Supplemental material**

2

3 **Supplement to:** Soil nutrient depletion is associated with the presence of *Burkholderia*

4 *pseudomallei*

5

6 Viriya Hantrakun<sup>1</sup>, Patpong Rongkard<sup>1</sup>, Malinee Oyuchua<sup>1</sup>, Premjit Amornchai<sup>1</sup>, Cherry Lim<sup>1</sup>,

7 Vanaporn Wuthiekanun<sup>1</sup>, Nicholas PJ Day<sup>1,2</sup>, Sharon J. Peacock<sup>1,3,4</sup>, Direk

8 Limmathurotsakul<sup>1,2,5\*</sup>

9

10 <sup>1</sup> Mahidol-Oxford Tropical Medicine Research Unit, Faculty of Tropical Medicine, Mahidol  
11 University, Thailand

12 <sup>2</sup> Centre for Tropical Medicine and Global Health, Nuffield Department of Clinical Medicine,  
13 Churchill Hospital, University of Oxford, United Kingdom

14 <sup>3</sup> Department of Medicine, Cambridge University, United Kingdom

15 <sup>4</sup> London School of Hygiene and Tropical Medicine, London, United Kingdom

16 <sup>5</sup> Department of Tropical Hygiene, Faculty of Tropical Medicine, Mahidol University, Thailand

17

18

19

20

21 **TABLE S1 Number of culture positive samples for *B. pseudomallei* in 61 rice fields**

22

| Regions   | Province          | Field * | Number of sampling points<br>culture positive for <i>B. pseudomallei</i><br>(per 100 sampling points) |
|-----------|-------------------|---------|-------------------------------------------------------------------------------------------------------|
| Northeast | Burirum           | NE1-1   | 87                                                                                                    |
|           |                   | NE1-2   | 0                                                                                                     |
|           |                   | NE1-3   | 97                                                                                                    |
|           | Chaiyaphum        | NE2-1   | 0                                                                                                     |
|           |                   | NE2-2   | 98                                                                                                    |
|           |                   | NE2-3   | 0                                                                                                     |
|           | Khon Kaen         | NE3-1   | 72                                                                                                    |
|           |                   | NE3-2   | 94                                                                                                    |
|           |                   | NE3-3   | 35                                                                                                    |
|           | Udon Thani        | NE4-1   | 40                                                                                                    |
|           |                   | NE4-2   | 0                                                                                                     |
|           |                   | NE4-3   | 28                                                                                                    |
|           | Nong Bua Lam Phu  | NE5-1   | 58                                                                                                    |
|           |                   | NE5-2   | 0                                                                                                     |
|           |                   | NE5-3   | 48                                                                                                    |
|           | Loei              | NE6-1   | 4                                                                                                     |
|           |                   | NE6-2   | 0                                                                                                     |
|           |                   | NE6-3   | 0                                                                                                     |
|           | Nakhon Ratchasima | NE7-1   | 2                                                                                                     |
|           |                   | NE7-2   | 0                                                                                                     |
|           |                   | NE7-3   | 0                                                                                                     |
| East      | Chachoengsao      | E1-1    | 39                                                                                                    |
|           |                   | E1-2    | 8                                                                                                     |
|           |                   | E1-3    | 43                                                                                                    |
|           |                   | E1-4    | 0                                                                                                     |
|           | Prachinburi       | E2-1    | 10                                                                                                    |
|           |                   | E2-2    | 6                                                                                                     |
|           |                   | E2-3    | 0                                                                                                     |
|           | Sa Kaeo           | E3-1    | 17                                                                                                    |
|           |                   | E3-2    | 0                                                                                                     |
|           |                   | E3-3    | 81                                                                                                    |
|           | Chanthaburi       | E4-1    | 16                                                                                                    |
|           |                   | E4-2    | 1                                                                                                     |
|           |                   | E4-3    | 0                                                                                                     |
|           | Chonburi          | E5-1    | 3                                                                                                     |
| E5-2      |                   | 32      |                                                                                                       |

| Regions | Province     | Field * | Number of sampling points<br>culture positive for <i>B. pseudomallei</i><br>(per 100 sampling points) |
|---------|--------------|---------|-------------------------------------------------------------------------------------------------------|
|         |              | E5-3    | 0                                                                                                     |
|         | Rayong       | E6-1    | 1                                                                                                     |
|         |              | E6-2    | 0                                                                                                     |
|         |              | E6-3    | 57                                                                                                    |
| Central | Phetchabun   | C1-1    | 0                                                                                                     |
|         |              | C1-2    | 0                                                                                                     |
|         |              | C1-3    | 3                                                                                                     |
|         | Phitsanulok  | C2-1    | 1                                                                                                     |
|         |              | C2-2    | 1                                                                                                     |
|         |              | C2-3    | 0                                                                                                     |
|         | Pathum Thani | C3-1    | 0                                                                                                     |
|         |              | C3-2    | 0                                                                                                     |
|         |              | C3-3    | 0                                                                                                     |
|         | Saraburi     | C4-1    | 0                                                                                                     |
|         |              | C4-2    | 0                                                                                                     |
|         |              | C4-3    | 0                                                                                                     |
|         | Lopburi      | C5-1    | 0                                                                                                     |
|         |              | C5-2    | 0                                                                                                     |
|         |              | C5-3    | 0                                                                                                     |
|         | Nakhon Nayok | C6-1    | 63                                                                                                    |
|         |              | C6-2    | 1                                                                                                     |
|         |              | C6-3    | 0                                                                                                     |
|         | Bangkok      | C7-1    | 0                                                                                                     |
|         |              | C7-2    | 0                                                                                                     |
|         |              | C7-3    | 0                                                                                                     |

23

24 \* Each rice field was divided into a grid system, in which 100 sampling points (10 by 10) were plotted 2.5 m apart.

25 At each sampling point, 10 g of soil at 30 cm depth was collected and cultured for *B. pseudomallei*.

26

27 **TABLE S2 Soil physicochemical properties associated with the presence of *B. pseudomallei***

28

| Soil physicochemical characteristics | Rice fields positive for <i>B. pseudomallei</i> <sup>1</sup> (n=30) | Rice fields negative for <i>B. pseudomallei</i> <sup>1</sup> (n=31) | Crude odds ratio (95% CI)     | p value |
|--------------------------------------|---------------------------------------------------------------------|---------------------------------------------------------------------|-------------------------------|---------|
| <b>Physical factors</b>              |                                                                     |                                                                     |                               |         |
| • Sand (%)                           | 22.4 (4.3-78.8)                                                     | 12.0 (7.8-81.0)                                                     | 1.04 (1.01-1.07)              | 0.02    |
| • Silt (%)                           | 32.2 (9.7-57.2)                                                     | 34.5 (11.7-53.2)                                                    | 0.99 (0.95-1.03)              | 0.68    |
| • Clay (%)                           | 34.1 (11.5-57.6)                                                    | 51.9 (7.3-58.6)                                                     | 0.93 (0.88-0.97)              | 0.002   |
| • Moisture (% w/w)                   | 9.9 (2.5-19.5)                                                      | 16.1 (7.9-31.8)                                                     | 0.78 (0.67-0.90)              | <0.001  |
| <b>Acidity and salinity factors</b>  |                                                                     |                                                                     |                               |         |
| • pH                                 | 6.8 (4.9-8.1)                                                       | 6.6 (5.0-7.8)                                                       | 1.23 (0.63-2.40)              | 0.54    |
| • Electrical conductivity (dS/m)     | 0.3 (0.04-1.4)                                                      | 0.5 (0.1-1.5)                                                       | 0.22 (0.09-0.53)              | 0.001   |
| • Lime requirement (kg/100sqm)       | 7.5 (0-30)                                                          | 6.2 (0-22.5)                                                        | 1.00 (1.00-1.01)              | 0.10    |
| <b>Chemical factors</b>              |                                                                     |                                                                     |                               |         |
| • Total nitrogen (mg/kg)             | 598 (175-2,442)                                                     | 731 (278-1,601)                                                     | 0.99 (0.98-1.01) <sup>2</sup> | 0.41    |
| • Available phosphorous (mg/kg)      | 5 (0.2-23)                                                          | 10 (0.4-38)                                                         | 0.35 (0.15-0.83) <sup>2</sup> | 0.02    |
| • Exchangeable potassium (mg/kg)     | 45 (11-115)                                                         | 93 (32-252)                                                         | 0.52 (0.37-0.74) <sup>2</sup> | <0.001  |
| • Exchangeable calcium (mg/kg)       | 673 (272-1,289)                                                     | 1474 (602-4,326)                                                    | 0.93 (0.90-0.97) <sup>2</sup> | 0.001   |
| • Available magnesium (mg/kg)        | 134 (44-498)                                                        | 255 (93-823)                                                        | 0.92 (0.87-0.97) <sup>2</sup> | 0.003   |
| • Extractable sulphur (mg/kg)        | 12 (0-114)                                                          | 24 (0-88)                                                           | 0.94 (0.77-1.15) <sup>2</sup> | 0.55    |
| • Exchangeable sodium (mg/kg)        | 144 (89-217)                                                        | 161 (98-241)                                                        | 0.87 (0.75-1.01) <sup>2</sup> | 0.07    |
| • Total iron (Fe; g/kg)              | 12 (0.6-96)                                                         | 36 (4- 79)                                                          | 0.95 (0.92-0.98)              | 0.002   |
| • Total cadmium                      |                                                                     |                                                                     | 1.0                           |         |
| ○ not detected                       | 25 fields (83%)                                                     | 11 fields (35%)                                                     |                               |         |
| ○ detected                           | 5 fields (17%)                                                      | 20 fields (65%)                                                     | 0.11 (0.03-0.37) <sup>3</sup> | <0.001  |
| • Cation exchange capacity (cmol/mg) | 6.7 (2.0-28.5)                                                      | 24.4 (0.6-47.9)                                                     | 0.89 (0.84-0.95)              | <0.001  |
| <b>Biological related factors</b>    |                                                                     |                                                                     |                               |         |
| • Organic matter (% w/w)             | 0.6 (0.2-1.5)                                                       | 1.5 (0.6-2.8)                                                       | 0.02 (0.003-0.17)             | <0.001  |
| • Carbon to nitrogen ratio           | 5.4 (2.0-19.3)                                                      | 11.0 (3.6-42.6)                                                     | 0.81 (0.70-0.94)              | 0.01    |

29

30 <sup>1</sup> Median (range) unless other are specified.

31 <sup>2</sup> Odds ratio for any increase of 100 mg/kg in nutrient.

32

33 **TABLE S3 Correlation coefficients among soil physicochemical properties in the East, Central and Northeast Thailand**

34

|                      | Sand     | Silt   | Clay    | pH       | LR <sup>1</sup> | OM <sup>1</sup> | EC <sup>1</sup> | TotalN <sup>1</sup> | AvailP <sup>1</sup> | ExchK <sup>1</sup> |
|----------------------|----------|--------|---------|----------|-----------------|-----------------|-----------------|---------------------|---------------------|--------------------|
| Sand                 | 1        |        |         |          |                 |                 |                 |                     |                     |                    |
| Silt                 | -0.74*** | 1      |         |          |                 |                 |                 |                     |                     |                    |
| Clay                 | -0.77*** | 0.13   | 1       |          |                 |                 |                 |                     |                     |                    |
| pH                   | 0.12     | -0.03  | -0.15   | 1        |                 |                 |                 |                     |                     |                    |
| LR <sup>1</sup>      | 0.22     | -0.29* | -0.05   | -0.49*** | 1               |                 |                 |                     |                     |                    |
| OM <sup>1</sup>      | -0.25*   | -0.01  | 0.38**  | -0.10    | -0.18           | 1               |                 |                     |                     |                    |
| EC <sup>1</sup>      | -0.14    | -0.09  | 0.29*   | -0.10    | -0.11           | 0.35**          | 1               |                     |                     |                    |
| TotalN <sup>1</sup>  | -0.13    | -0.08  | 0.27*   | -0.15    | 0.14            | 0.35**          | 0.18            | 1                   |                     |                    |
| AvailP <sup>1</sup>  | -0.17    | 0.16   | 0.11    | -0.04    | -0.01           | 0.37**          | 0.11            | 0.28*               | 1                   |                    |
| ExchK <sup>1</sup>   | -0.27*   | -0.11  | 0.51*** | -0.26*   | -0.16           | 0.63***         | 0.44***         | 0.31*               | 0.40**              | 1                  |
| ExchCa <sup>1</sup>  | -0.19    | -0.07  | 0.35**  | -0.06    | -0.36**         | 0.57***         | 0.29*           | 0.10                | 0.17                | 0.64***            |
| AvailMg <sup>1</sup> | -0.27*   | 0.02   | 0.38**  | -0.14    | -0.28*          | 0.47***         | 0.19            | 0.16                | 0.003               | 0.47***            |
| ExtrS <sup>1</sup>   | -0.20    | 0.17   | 0.14    | -0.20    | -0.01           | 0.14            | 0.21            | 0.14                | 0.16                | 0.17               |
| ExchNa <sup>1</sup>  | -0.38**  | 0.26*  | 0.32*   | -0.23    | 0.03            | 0.26*           | 0.12            | 0.16                | 0.24                | 0.29*              |
| CEC <sup>1</sup>     | -0.31*   | -0.06  | 0.51*** | -0.25    | -0.12           | 0.76***         | 0.34**          | 0.27*               | 0.18                | 0.69***            |
| Moisture             | -0.46*** | 0.16   | 0.53*** | -0.27*   | -0.18           | 0.55***         | 0.23            | 0.26*               | 0.20                | 0.60***            |
| CNRatio <sup>1</sup> | 0.003    | 0.001  | -0.01   | 0.05     | -0.24           | 0.57***         | 0.04            | -0.36**             | 0.28*               | 0.27*              |
| CD <sup>1</sup>      | -0.25*   | 0.12   | 0.26*   | 0.07     | -0.13           | 0.63***         | 0.15            | 0.09                | 0.24                | 0.32*              |
| Iron <sup>1</sup>    | -0.38**  | 0.08   | 0.48*** | -0.16    | 0.004           | 0.63***         | 0.11            | 0.21                | 0.27*               | 0.42***            |

35

36 Statistically significant \*p≤0.05, \*\*p≤0.01 and \*\*\*p≤0.001

37

|                      | ExchCa <sup>1</sup> | AvailMg <sup>1</sup> | ExtrS <sup>1</sup> | ExchNa <sup>1</sup> | CEC <sup>1</sup> | Moisture | CNRatio <sup>1</sup> | CD <sup>1</sup> | Iron <sup>1</sup> |
|----------------------|---------------------|----------------------|--------------------|---------------------|------------------|----------|----------------------|-----------------|-------------------|
| ExchCa <sup>1</sup>  | 1                   |                      |                    |                     |                  |          |                      |                 |                   |
| AvailMg <sup>1</sup> | 0.69***             | 1                    |                    |                     |                  |          |                      |                 |                   |
| ExtrS <sup>1</sup>   | -0.01               | 0.19                 | 1                  |                     |                  |          |                      |                 |                   |
| ExchNa <sup>1</sup>  | 0.26*               | 0.37**               | 0.21               | 1                   |                  |          |                      |                 |                   |
| CEC <sup>1</sup>     | 0.62***             | 0.68***              | 0.24               | 0.33**              | 1                |          |                      |                 |                   |
| Moisture             | 0.39**              | 0.31*                | 0.10               | 0.33**              | 0.55***          | 1        |                      |                 |                   |
| CNRatio <sup>1</sup> | 0.38**              | 0.27*                | 0.05               | 0.09                | 0.39**           | 0.24     | 1                    |                 |                   |
| CD <sup>1</sup>      | 0.41***             | 0.54***              | 0.04               | 0.36**              | 0.54***          | 0.22     | 0.46***              | 1               |                   |
| Iron <sup>1</sup>    | 0.29*               | 0.29*                | 0.09               | 0.29*               | 0.46***          | 0.53***  | 0.34**               | 0.48***         | 1                 |

39

40 Statistically significant \* $p \leq 0.05$ , \*\* $p \leq 0.01$  and \*\*\* $p \leq 0.001$

41 <sup>1</sup>Abbreviations used for soil properties: lime requirement (LR), electrical conductivity (EC), total Nitrogen (TotalN), available phosphorous (AvailP), exchangeable  
 42 potassium (ExchK), exchangeable calcium (ExchCa), available magnesium (AvailMg), extractable sulphur (ExtrS), total iron (Iron), total cadmium (CD),  
 43 exchangeable sodium (ExchNa) and cation exchange capacity (CEC), organic matter (OM) and carbon to nitrogen ratio (CNRatio)

44 **TABLE S4 Association between soil physicochemical properties and quantity of *B.***  
45 ***pseudomallei* distribution in rice field determined by ordered logistic regression**

46

| <b>Soil physicochemical characteristics</b> | <b>Adjusted odds ratio (95% CI)</b> | <b>p value</b> |
|---------------------------------------------|-------------------------------------|----------------|
| Organic matter (% w/w)                      | 0.06 (0.01-0.32)                    | 0.001          |
| Moisture (%)                                | 0.78 (0.66-0.91)                    | 0.002          |
| Electrical conductivity (dS/m)              | 0.07 (0.01-0.53)                    | 0.01           |

47

48

49 **TABLE S5 Soil physicochemical properties methods used and normal range**

50

| <b>Soil physicochemical characteristics</b>                                         | <b>Method &amp; Definition</b>                                                                                 | <b>Normal range</b>                                                                                                                                                                                    |
|-------------------------------------------------------------------------------------|----------------------------------------------------------------------------------------------------------------|--------------------------------------------------------------------------------------------------------------------------------------------------------------------------------------------------------|
| <b>Physical factors</b>                                                             |                                                                                                                |                                                                                                                                                                                                        |
| <ul style="list-style-type: none"> <li>Percentage of sand, silt and clay</li> </ul> | Hydrometer method classified by particles size: sand (0.05– 2 mm), silt (0.002 – 0.05 mm) and clay (<0.002 mm) | Combination of sand, silt and clay is 100%                                                                                                                                                             |
| <ul style="list-style-type: none"> <li>Moisture (% w/w)</li> </ul>                  | Gravimetric method                                                                                             | Not available                                                                                                                                                                                          |
| <b>Acidity and salinity factors</b>                                                 |                                                                                                                |                                                                                                                                                                                                        |
| <ul style="list-style-type: none"> <li>pH</li> </ul>                                | pH meter method: Acidity and alkalinity of the soil                                                            | Extremely acid <4.5,<br>Very acid soil 4.5-5.5,<br>Mild acid 5.6-6.5,<br>Neutral 6.6–7.3,<br>Mild alkaline 7.4-7.8,<br>Alkaline 7.9-8.4,<br>Very alkaline 8.5-9.0, Extremely alkaline 9.0 <sup>2</sup> |
| <ul style="list-style-type: none"> <li>Electrical conductivity (dS/m)</li> </ul>    | EC meter method: soluble salt content in the soil                                                              | Very low (non-saline) 0-2,<br>Mild salinity 2-4,<br>saline soil 4-8,<br>high 8-16,<br>very high $\geq 16^2$                                                                                            |
| <ul style="list-style-type: none"> <li>Lime requirement (kg/100sqm)</li> </ul>      | Woodruff buffer method                                                                                         | Not available                                                                                                                                                                                          |
| <b>Chemical factors</b>                                                             |                                                                                                                |                                                                                                                                                                                                        |
| <ul style="list-style-type: none"> <li>Total nitrogen (mg/kg)</li> </ul>            | Kjeldahl method                                                                                                | Not available                                                                                                                                                                                          |
| <ul style="list-style-type: none"> <li>Available phosphorous (mg/kg)</li> </ul>     | Bray II method                                                                                                 | Very low <6,<br>low 6-12,<br>average 13-25,<br>high 26-50,<br>very high >50 mg/kg <sup>2</sup>                                                                                                         |
| <ul style="list-style-type: none"> <li>Exchangeable potassium (mg/kg)</li> </ul>    | Automated Flame photometric method                                                                             | Very low <16,<br>low 16-30,<br>average 31-60,<br>high 60-120,<br>very high >120 mg/kg <sup>2</sup>                                                                                                     |
| <ul style="list-style-type: none"> <li>Exchangeable calcium (mg/kg)</li> </ul>      | Flame photometric method                                                                                       | Not available                                                                                                                                                                                          |
| <ul style="list-style-type: none"> <li>Available magnesium (mg/kg)</li> </ul>       | Flame photometric method                                                                                       | Not available                                                                                                                                                                                          |
| <ul style="list-style-type: none"> <li>Extractable sulphur (mg/kg)</li> </ul>       | Turbidimetric method                                                                                           | Not available                                                                                                                                                                                          |
| <ul style="list-style-type: none"> <li>Exchangeable sodium (mg/kg)</li> </ul>       | Flame photometric method 6020                                                                                  | Not available                                                                                                                                                                                          |
| <ul style="list-style-type: none"> <li>Total iron (Fe; g/kg)<sup>3</sup></li> </ul> | Based on US EPA method 6101B                                                                                   | Not available                                                                                                                                                                                          |
| <ul style="list-style-type: none"> <li>Total cadmium (mg/kg)<sup>3</sup></li> </ul> | Based on US EPA method 6020                                                                                    | <37 mg/kg <sup>1</sup>                                                                                                                                                                                 |



| <b>Soil physicochemical characteristics</b>                                          | <b>Method &amp; Definition</b>                                                                                                                                                        | <b>Normal range</b>                                                                                                                |
|--------------------------------------------------------------------------------------|---------------------------------------------------------------------------------------------------------------------------------------------------------------------------------------|------------------------------------------------------------------------------------------------------------------------------------|
| <ul style="list-style-type: none"> <li>Cation exchange capacity (cmol/kg)</li> </ul> | Filtration method: The number of exchangeable cations per dry weight that a soil is capable of holding, at a given pH value, and available for exchange with the soil water solution. | >15 cmol/kg <sup>2</sup>                                                                                                           |
| <b>Biological related factors</b>                                                    |                                                                                                                                                                                       |                                                                                                                                    |
| <ul style="list-style-type: none"> <li>Organic matter (% w/w)</li> </ul>             | Walkley and black method.                                                                                                                                                             | very low <0.5%,<br>low 0.5-1.5%,<br>average 1.5-2.5%,<br>somewhat high 2.5-3.5%,<br>high 3.5-4.5%,<br>very high >4.5% <sup>2</sup> |
| <ul style="list-style-type: none"> <li>Carbon to nitrogen ratio</li> </ul>           | Walkley and black method/Kjeldahl method: A ratio of the mass of carbon to the mass of nitrogen in a substance.                                                                       | Not available                                                                                                                      |

51

52 <sup>1</sup> Pollution Control Department (PCD), Ministry of Science Technology and Environment, Thailand

53 <sup>2</sup> Land Development Department (LDD), Ministry of Agriculture and Cooperatives, Thailand

54 <sup>3</sup> Iron and cadmium were tested by Central Laboratory (Bangkok, Thailand).
